# Supplementary material
Source: PubMed Central journal article supplement (PMC4935961)
Supplement: es6b00319_si_001.pdf [file es6b00319_si_001.pdf]

## Supporting Information

# A MODEL USING LOCAL WEATHER DATA TO DETERMINE THE EFFECTIVE SAMPLING VOLUME FOR PCB CONGENERS COLLECTED ON PASSIVE AIR SAMPLERS

NICHOLAS J. HERKERT, ANDRES MARTINEZ\*, AND KERI C. HORNBUCKLE \*

Department of Civil and Environmental Engineering IIHR-Hydroscience and Engineering  
The University of Iowa. Iowa City, IA 52242 USA

\* Phone (319) 335-5148 (K.C.H), (319) 335-5647 (A.M.); FAX: (319) 335-566; e-mail: [Keri-hornbuckle@uiowa.edu](mailto:Keri-hornbuckle@uiowa.edu) (K.C.H.), [andres-martinez@uiowa.edu](mailto:andres-martinez@uiowa.edu) (A.M.).

## Contents

|                                                                        |     |
|------------------------------------------------------------------------|-----|
| Integrated Surface Database (ISD) Lite Dataset Processing Script ..... | S2  |
| PUF-PAS Effective Volume Model.....                                    | S2  |
| PCB Physical Chemical Properties (CSV File) .....                      | S2  |
| PCB LFER Descriptors (CSV File) .....                                  | S2  |
| Chicago Sampling Locations .....                                       | S3  |
| Sampler Design for Comparison Studies .....                            | S5  |
| Effects of Temperature Changes.....                                    | S6  |
| Long Deployment Periods .....                                          | S7  |
| GAPS Template Comparison.....                                          | S9  |
| $K_{PUF}$ Calculation Method Comparison.....                           | S10 |
| Steps to Run Effective Volume Model: .....                             | S12 |
| References.....                                                        | S25 |

## **Integrated Surface Database (ISD) Lite Dataset Processing Script**

For hourly weather parameter, the Model uses the Integrated Surface Database (ISD) Lite database accessed through NOAA's National Centers for Environmental Information (NCEI) website.<sup>1</sup> A Matlab script, developed and run in Matlab version R2015a, for processing the Raw ISD Lite datasets is attached as a Matlab file (**process\_isd\_met\_data.m**).

## **PUF-PAS Effective Volume Model**

The Matlab script, developed and run in Matlab version R2015a, for calculating PUF-PAS Effective Volume is attached as a Matlab file (**PUF\_PAS\_Effective\_Volume\_Model.m**)

## **PCB Physical Chemical Properties (CSV File)**

The model requires the physical-chemical properties for all PCB congeners, such as molecular weight (MW), octanol-air partitioning coefficient ( $K_{oa}$ ) at 25 °C, and internal energies of octanol-air transfer ( $dU_{oa}$ ). These values are given in an accompanying CSV (comma separated values) file that is critical to use of the PUF-PAS Effective Volume Model (**PCB\_PROPERTIES\_MW\_DU\_KOA.csv**). Ensure this file is in the same workspace as the PUF-PAS Effective Volume Model script.

## **PCB LFER Descriptors (CSV File)**

If the user decides to use the linear free energy relationship (LFER) to predict  $K_{PUF}$  for PCBs partitioning to polyurethane foam disks, the model will require the accompanying CSV file containing the descriptors for PCBs (**PCB\_LFER\_descriptors.csv**). Ensure this file is in the same workspace as the PUF-PAS Effective Volume Model script.

## Chicago Sampling Locations

Table S1: Summary of site locations, longitude, latitude, and number of samples collected at that site.

| Site ID | Sampling Site Name                     | Longitude  | Latitude   | N  | Mean Concentration (pg m-3) | Standard Error |
|---------|----------------------------------------|------------|------------|----|-----------------------------|----------------|
| AU      | Aurora                                 | -88.329374 | 41.784717  | 9  | 74                          | 1.25           |
| CN      | Channahon Park                         | -88.187542 | 41.468465  | 9  | 102                         | 1.29           |
| CP      | Chase Park                             | -87.669303 | 41.967150  | 3  | 241                         | 1.35           |
| GE      | Graves Elementary School               | -87.805740 | 41.782596  | 6  | 289                         | 1.34           |
| HC      | Harrison Crib                          | -87.572256 | 41.916117  | 1  | 998                         | N/A            |
| *IT     | Illinois Institute of Technology (IIT) | -87.624700 | 41.834400  | 6  | 571                         | 1.05           |
| JP      | Jefferson Park                         | -87.762946 | 41.968148  | 14 | 198                         | 1.22           |
| JT      | Joliet Township                        | -88.124903 | 41.529934  | 12 | 2507                        | 1.18           |
| JN      | Jardine Water Plant - Over Intake      | -87.606188 | 41.8959050 | 12 | 1907                        | 1.19           |
| *JS     | Jardine Water Plant - Southeast Corner | -87.602717 | 41.89355   | 12 | 716                         | 1.17           |
| KC      | Kane County Health Department          | -88.329528 | 41.784623  | 2  | 230                         | 1.18           |
| *LM     | Lemont                                 | -87.990570 | 41.668120  | 11 | 277                         | 1.12           |
| NC      | Naperville City Hall                   | -88.153036 | 41.770978  | 11 | 98                          | 1.28           |
| NP      | Norwood Park                           | -87.794134 | 41.986593  | 7  | 154                         | 1.23           |
| PP      | Portage Park                           | -87.762161 | 41.955091  | 12 | 313                         | 1.19           |
| SP      | Sauganash Park                         | -87.737399 | 41.988401  | 12 | 286                         | 1.19           |
| SL      | Schiller Park                          | -87.865005 | 41.954700  | 10 | 215                         | 1.17           |
| VM      | Village of McCook                      | -87.832527 | 41.800371  | 11 | 131                         | 1.20           |
| WH      | Waukegan Harbor                        | -87.822736 | 42.363092  | 6  | 391                         | 1.24           |
| WP      | Winnemac Park                          | -87.684438 | 41.974165  | 14 | 165                         | 1.11           |

\*Denotes sites with samples in the subset of 180 total samples specifically examined in this study.

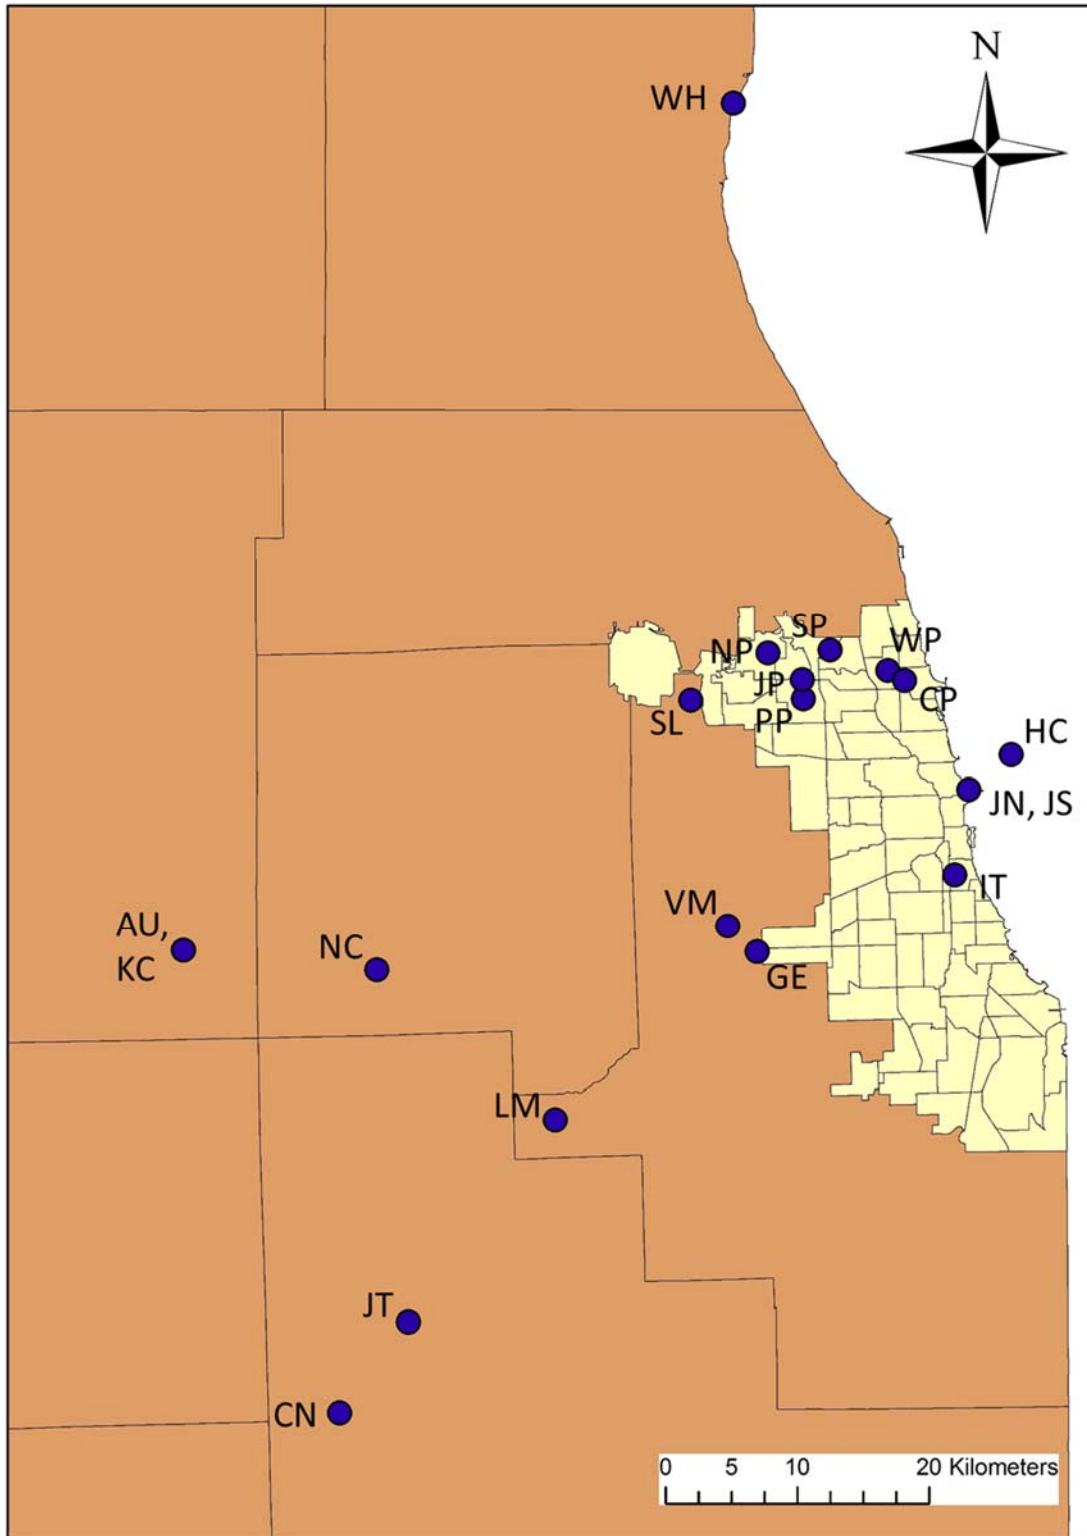

Figure S1: The 20 sampling sites used for the study in the Metropolitan Chicago area are denoted above on the map with their corresponding site IDs as noted in Table S1.

## Sampler Design for Comparison Studies

Table S2: Description of PUF disk and sampler housing differences between the comparison studies.

|                |                                 | This Study          | Melymuk et al (2011) <sup>2</sup> | Chaemfa et al (2008) <sup>3</sup><br>-Lancaster Design |      |
|----------------|---------------------------------|---------------------|-----------------------------------|--------------------------------------------------------|------|
| PUF Disk       | PUF Disk Manufacturer           | Tisch Environmental | PacWill Environmental             | Klaus Ziemer GmbH                                      |      |
|                | Length (cm)                     | 14                  | 14                                | 14                                                     |      |
|                | Thickness (cm)                  | 1.35                | 1.35                              | 1.2                                                    |      |
|                | Density (g cm <sup>-3</sup> )   | 0.0213              | 0.0213                            | 0.035                                                  |      |
|                | Surface Area (cm <sup>2</sup> ) | 365                 | 365                               | 365                                                    |      |
| Housing Design | Top                             | Diameter (cm)       | 24.0                              | 23.0                                                   | 26.0 |
|                |                                 | Depth (cm)          | 8.0                               | 8.0                                                    | 10.5 |
|                | Bottom                          | Diameter (cm)       | 20.0                              | 19.0                                                   | 19.5 |
|                |                                 | Depth (cm)          | 7.0                               | 7.0                                                    | 7.0  |
|                | Gap depth (cm)                  |                     | 1.5                               | 0.75                                                   | 1.5  |
|                | Gap width (cm)                  |                     | 2.0                               | 2.0                                                    | 2.5  |

## Effects of Temperature Changes

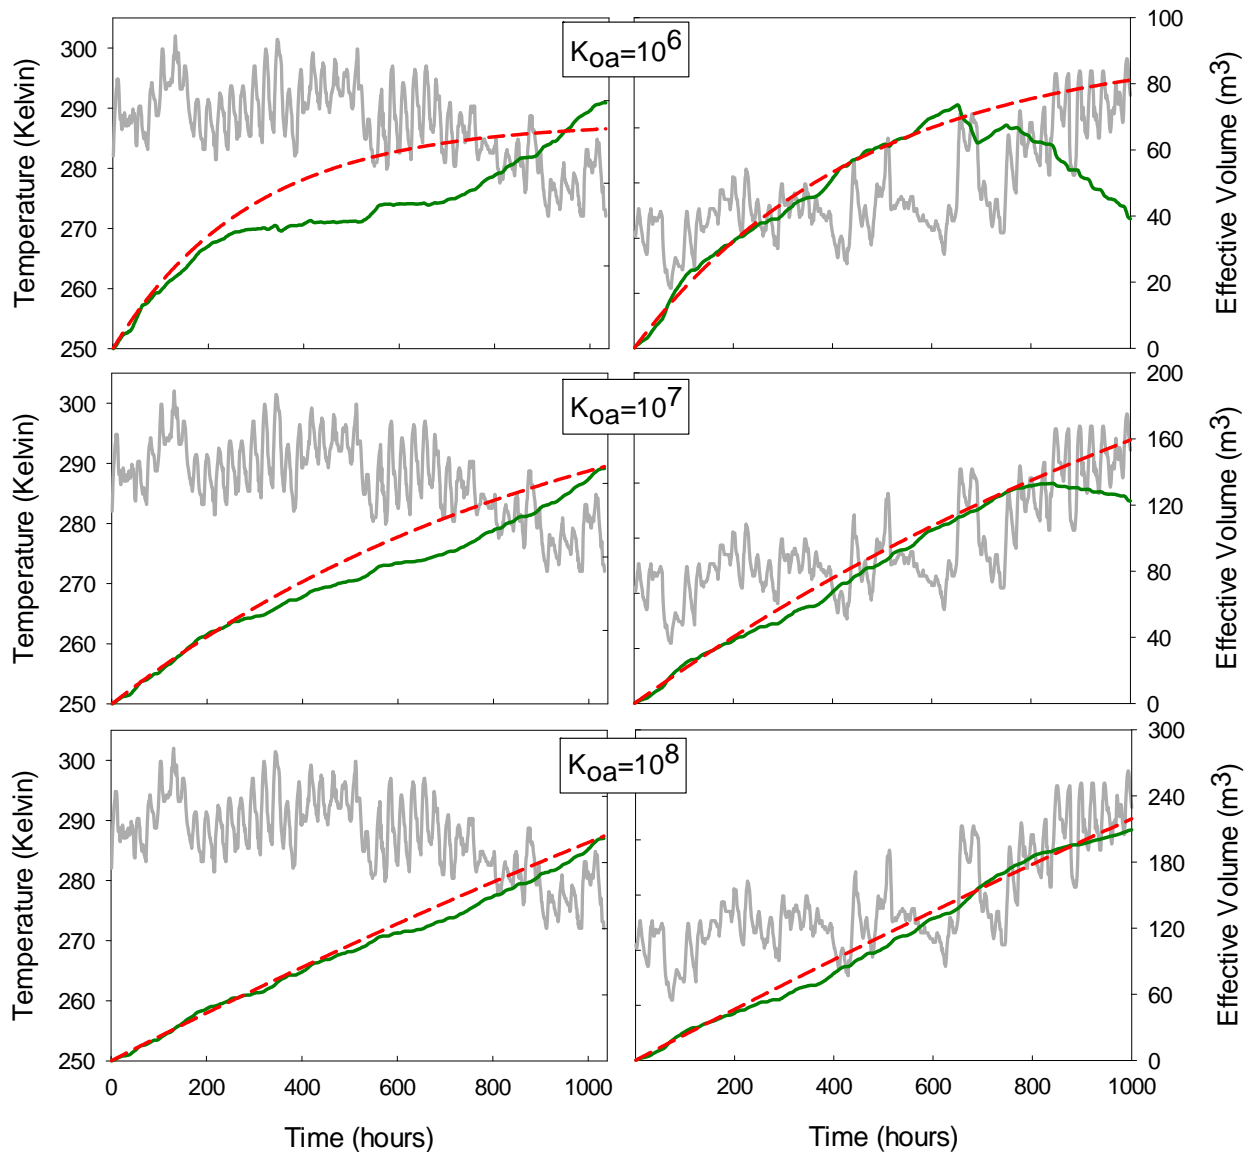

Figure S2: Example effective sampling volume curves for deployments with decreasing temperature (left) and increasing temperature (right). The solid grey line represents hourly air temperature. The solid green line represents the effective sampling volume calculated using the method of this study, including hourly adjustments on  $k_v$  and  $K_{PUF}$ . The dashed red line, represent effective sampling volume calculated using average values for  $k_v$  and  $K_{PUF}$ .

## Long Deployment Periods

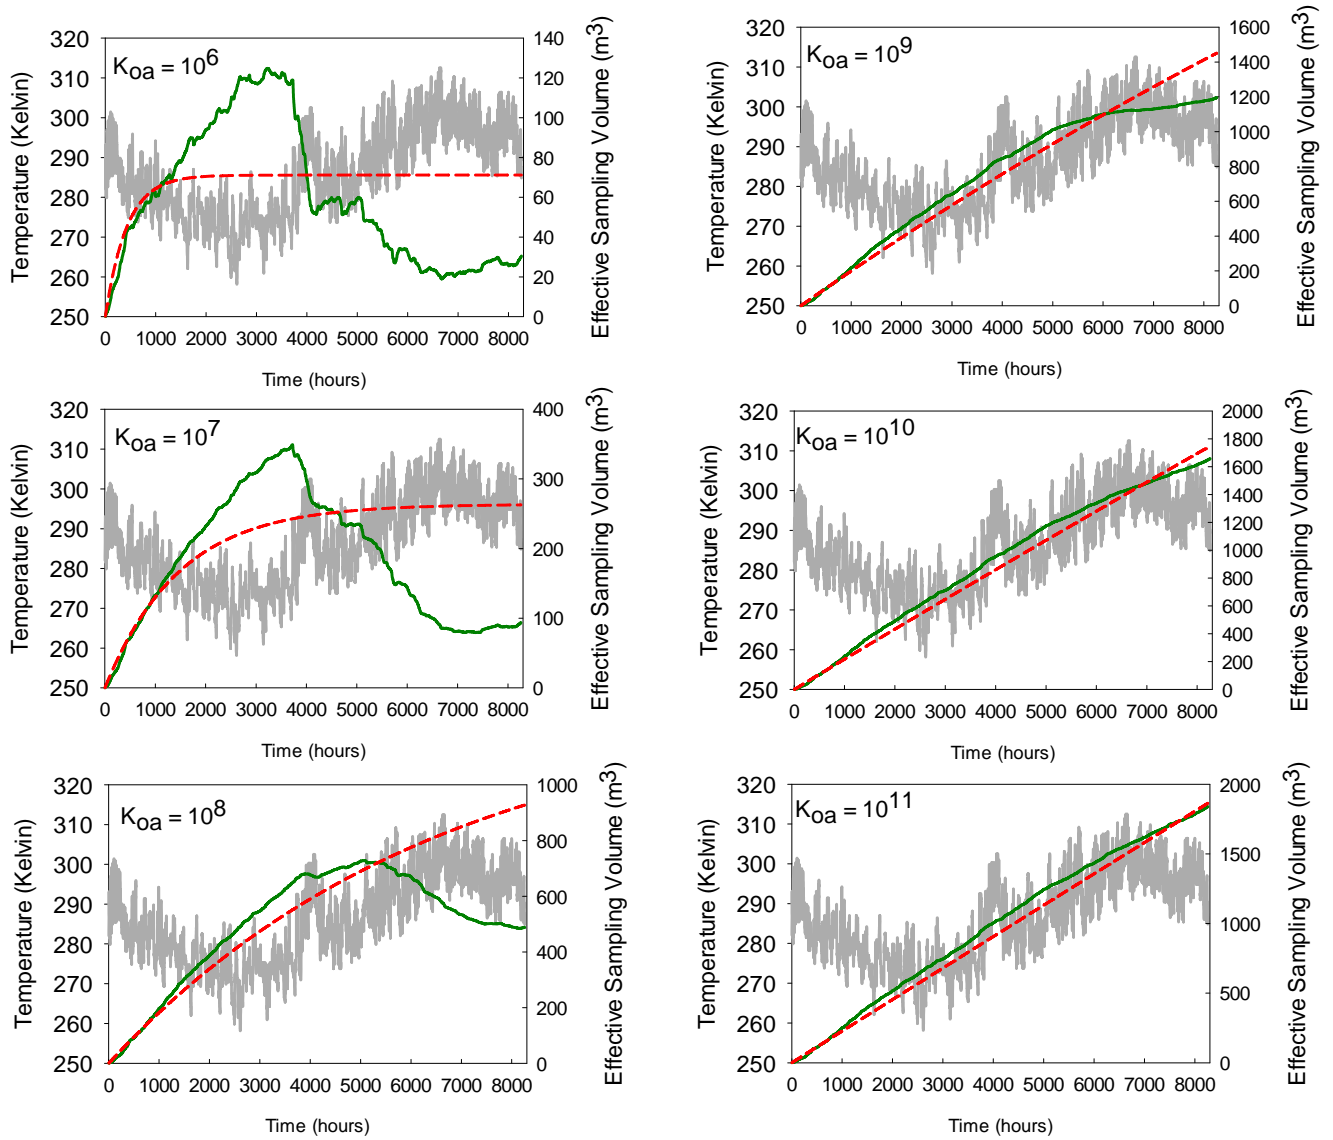

Figure S3: One sample involved in our study was deployed for 344 days from October 3<sup>th</sup>, 2011 to November 11<sup>th</sup>, 2012. The solid grey line represents hourly air temperature. The solid green line represents the effective sampling volume calculated using the method of this study, including hourly adjustments on  $k_v$  and  $K_{PUF}$ . The dashed red line, represent effective sampling volume calculated using average values for  $k_v$  and  $K_{PUF}$ .

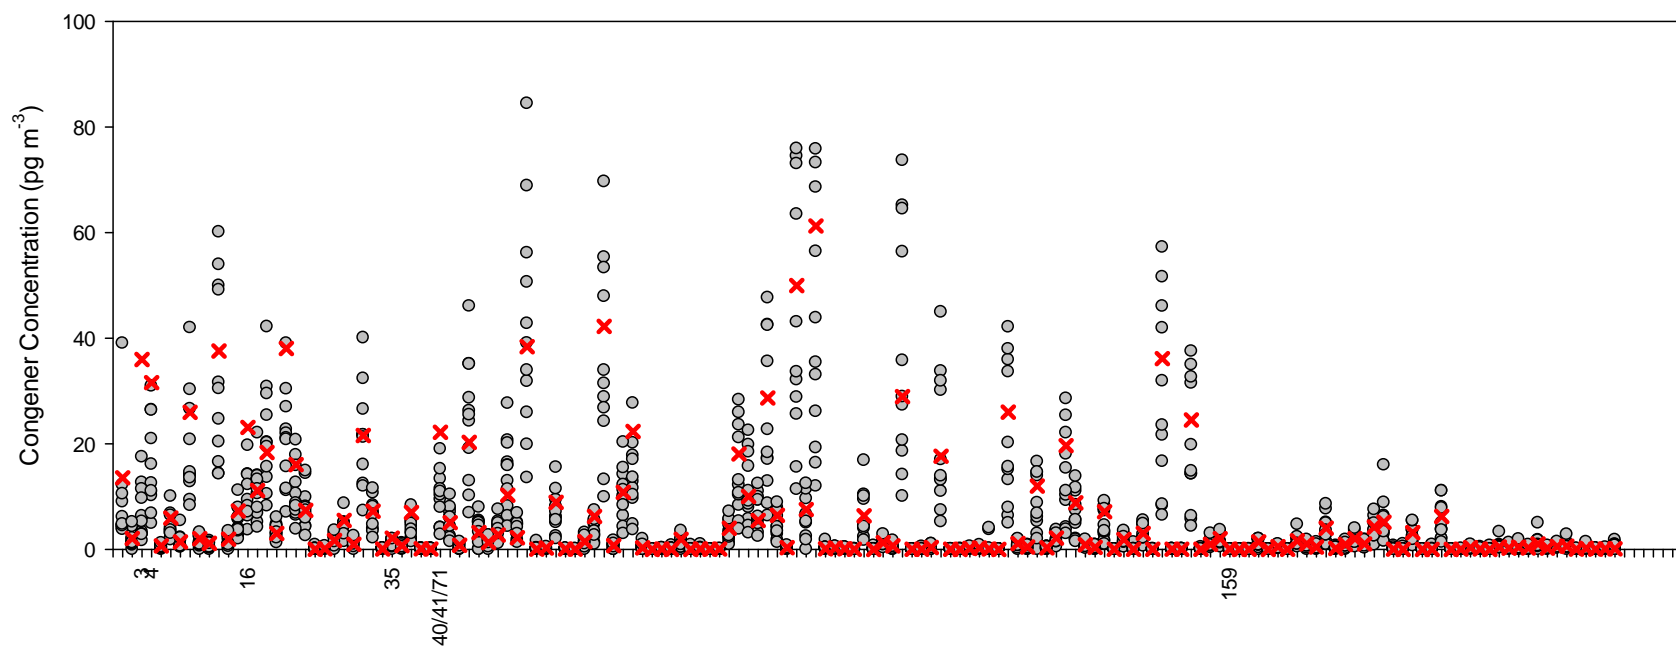

Figure S4: Profile comparison of long deployment sample (denoted with red x) at Jardine Water Plant - Southeast Corner (JS) site and all other samples (grey circles) for JS site. The six PCB congeners (3, 4, 16, 35, 40+41+71, and 159) that fell out of the range of what was observed at the JS site in all other samples collected at the JS site, are denoted on the x-axis.



## GAPS Template Comparison

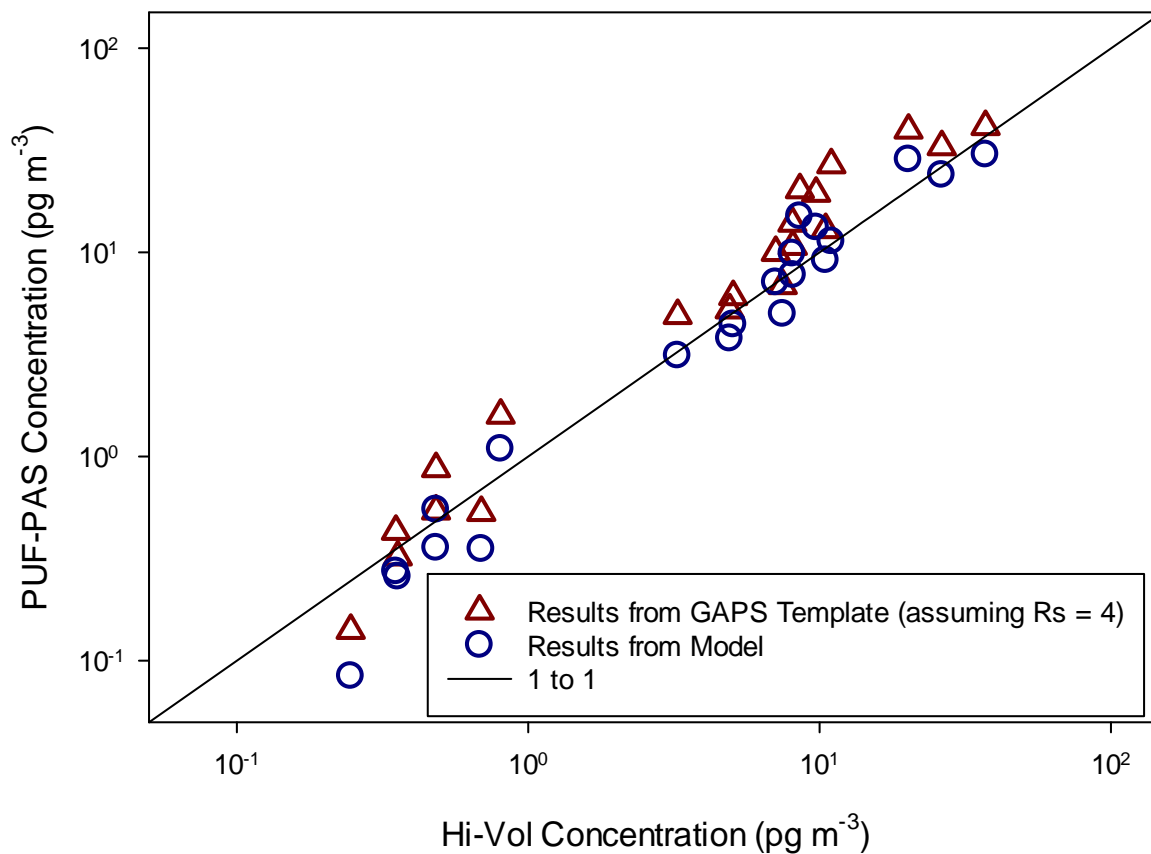

Figure S5: The model results for the Chicago comparison was also compared with results obtained using the commonly used GAPS template.<sup>4</sup> When using the GAPS template it was assumed that the sampling rate was 4 (the default) and particle phase sampling rate as a fraction of gas-phase rate was 1 (i.e. equivalent). From only a subset of congeners compatible between the datasets, the method ratio using the GAPS template calculation was 0.75, while the method ratio using the model was 1.09.

## K<sub>PUF</sub> Calculation Method Comparison

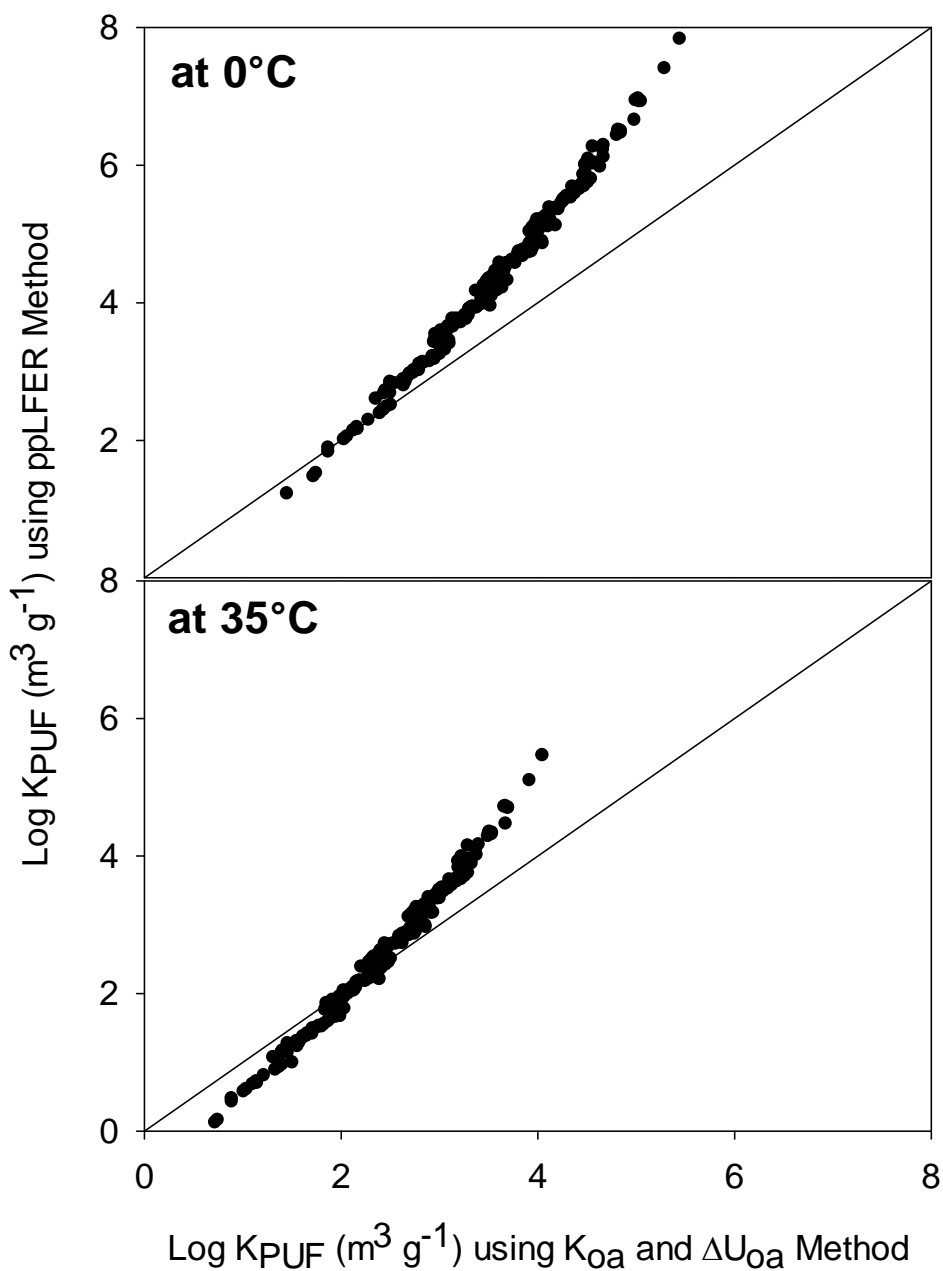

Figure S6: Comparison of the K<sub>PUF</sub> values for all 209 PCB congeners using the temperature dependent LFER method for polyurethane foam given by Sprunger et al.<sup>5</sup> modified from Kamprad and Goss,<sup>6</sup> and empirical relationship with K<sub>oa</sub> proposed by Shoeib and Harner.<sup>7</sup>

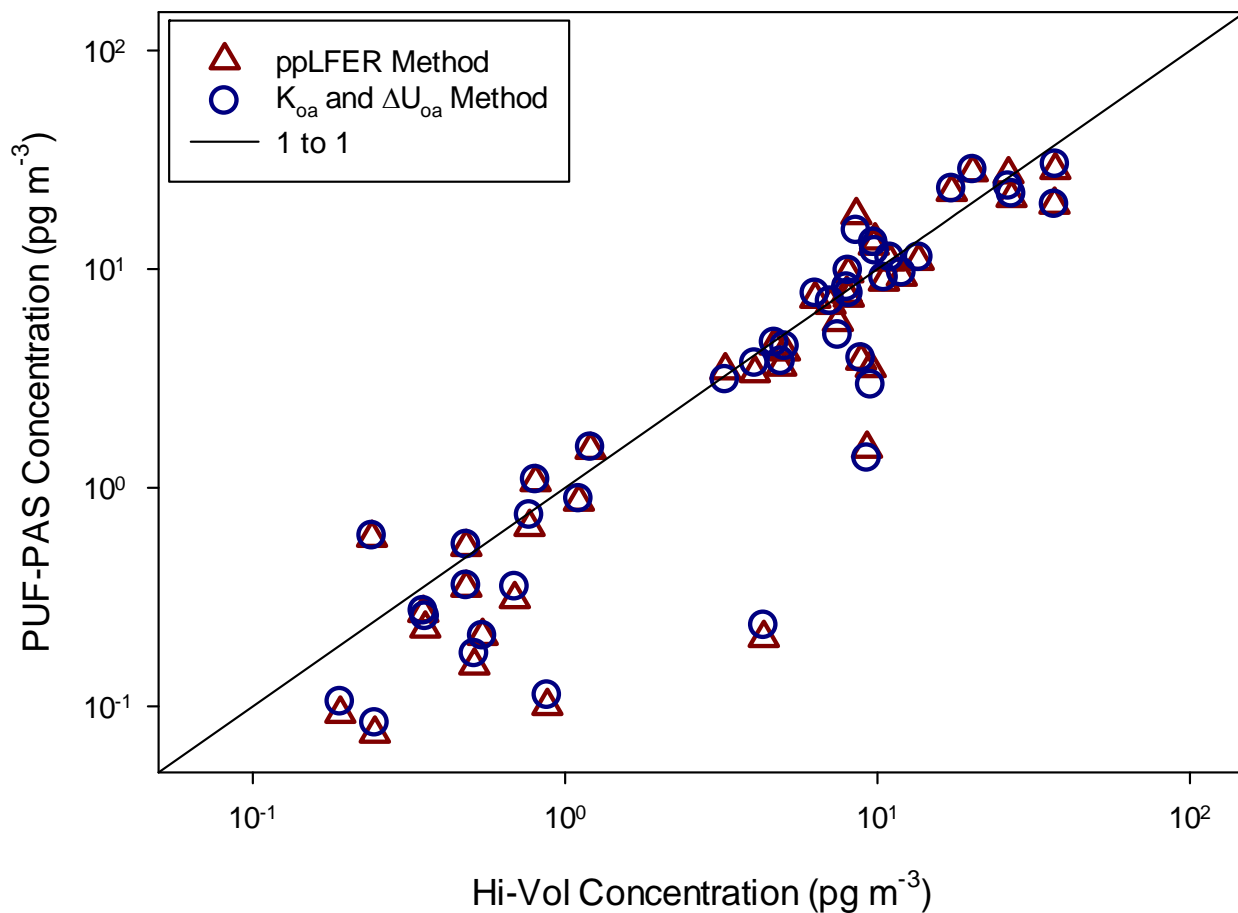

Figure S7: The model results for the Chicago comparison were recalculated using the temperature dependent LFER for polyurethane foam given by Sprunger et al.<sup>5</sup> modified from Kamprad and Goss.<sup>6</sup> It was found the average method ratio for the Chicago comparison using the LFER determined  $K_{PUF}$  was 1.63, compared to 1.59 for the comparison using the temperature corrected  $K_{PUF}$  determined by the empirical relationship proposed by Shoeib and Harner.<sup>7</sup>

## Steps to Run Effective Volume Model:

1. Identify the Site ID of the NOAA Integrated Surface Dataset that corresponds to the spatial location of your study using the Map Tool provided on the NOAA website
  - a. Go to → <https://gis.ncdc.noaa.gov/map/viewer/>
  - b. Click on Hourly/Sub-Hourly under the Time-Related Maps tab on the map GUI

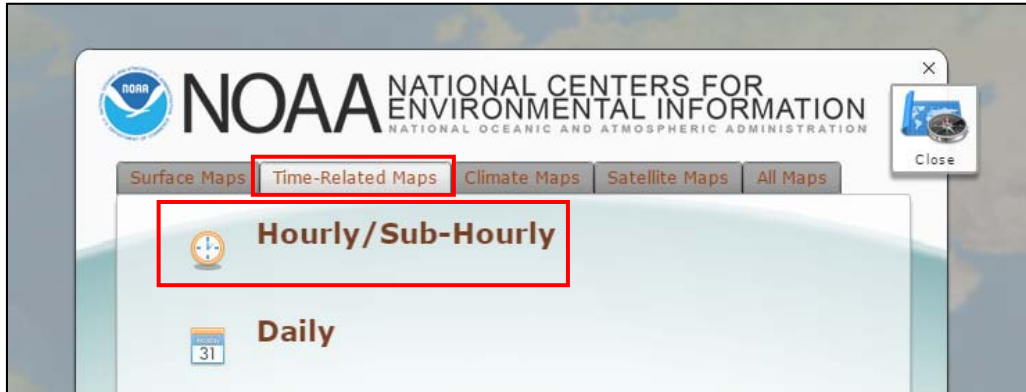

- c. Use the Map to zoom into the spatial location of your sampling location

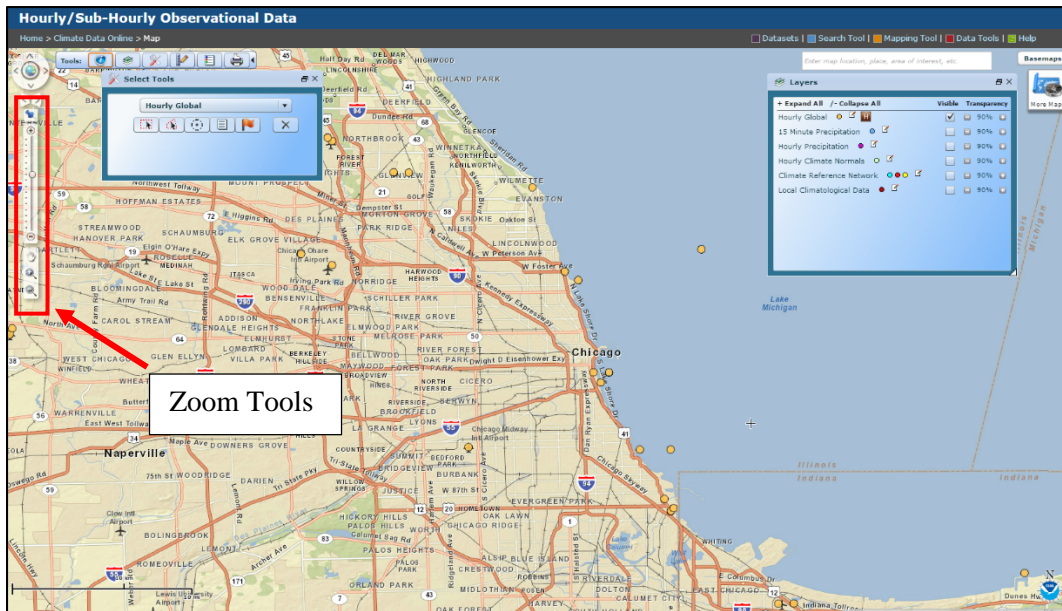

- d. Click on the information cursor option in the upper left hand corner of the screen

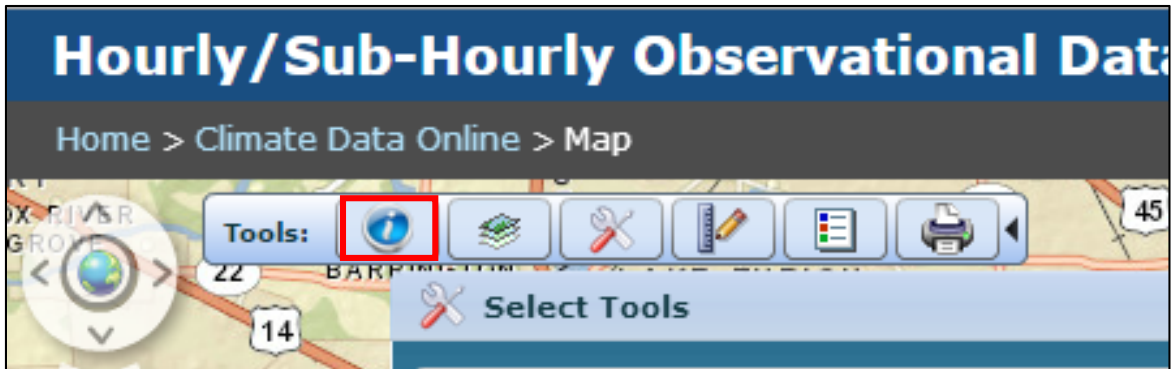

- e. Select a weather station that is spatially close to your sampling location and ensure the weather data spans the appropriate time to encapsulate your study. (From our experience the best data quality typically comes from Airport data and we recommend selecting airport data where possible.)

**Results**

**Hourly Global**

Use checkboxes below for single/multiple data access (maximum 100)

| <input type="checkbox"/> | Station ▲               |     | AWS    | WBAN  | Begin Date | End Date   | State |
|--------------------------|-------------------------|-----|--------|-------|------------|------------|-------|
| <input type="checkbox"/> | CHICAGO O'HARE INTERNAT | lll | 725300 | 94846 | 1946/10/01 | 2015/11/15 | IL    |
| <input type="checkbox"/> | CHICAGO OHARE INTL AP   | lll | 999999 | 94846 | 1970/01/01 | 1972/12/31 | IL    |

Get Selected Data

- f. If the weather station spans the appropriate time span, record the AWS and WBAN number, for future reference (from above example 725300-94846)

2. Obtain the Raw NOAA ISD Lite file for the given year/years of your study and download them into your MATLAB workspace
  - a. Go to → <ftp://ftp.ncdc.noaa.gov/pub/data/noaa/isd-lite>
  - b. Select the appropriate year for your study

| Index of /pub/data/noaa/isd-lite |      |                      |
|----------------------------------|------|----------------------|
| Name                             | Size | Date Modified        |
| [parent directory]               |      |                      |
| 1901/                            |      | 9/29/14, 12:00:00 AM |
| 1902/                            |      | 9/29/14, 12:00:00 AM |
| 1903/                            |      | 9/29/14, 12:00:00 AM |
| 1904/                            |      | 9/29/14, 12:00:00 AM |
| 1905/                            |      | 9/29/14, 12:00:00 AM |
| 1906/                            |      | 9/29/14, 12:00:00 AM |
| 1907/                            |      | 9/29/14, 12:00:00 AM |
| 1908/                            |      | 9/29/14, 12:00:00 AM |
| 1909/                            |      | 9/29/14, 12:00:00 AM |
| 1910/                            |      | 9/29/14, 12:00:00 AM |

- c. Location the weather station ID previously recorded via the map tool (We recommend using the search function control-f)

|                      |         |                      |
|----------------------|---------|----------------------|
| 725283-99999-2012.gz | 38.9 kB | 11/15/15, 8:19:00 AM |
| 725287-04724-2012.gz | 86.5 kB | 11/15/15, 8:19:00 AM |
| 725290-14768-2012.gz | 88.9 kB | 11/15/15, 8:19:00 AM |
| 725292-14976-2012.gz | 79.0 kB | 11/15/15, 8:19:00 AM |
| 725293-03755-2012.gz | 42.0 kB | 11/15/15, 8:19:00 AM |
| 725294-99999-2012.gz | 55.0 kB | 11/15/15, 8:19:00 AM |
| 725300-94846-2012.gz | 88.5 kB | 11/15/15, 8:19:00 AM |
| 725305-94892-2012.gz | 86.1 kB | 11/15/15, 8:19:00 AM |
| 725314-03960-2012.gz | 85.2 kB | 11/15/15, 8:19:00 AM |
| 725315-94870-2012.gz | 86.6 kB | 11/15/15, 8:19:00 AM |
| 725316-03887-2012.gz | 86.2 kB | 11/15/15, 8:19:00 AM |

- d. Download the appropriate file and extract the zip file.

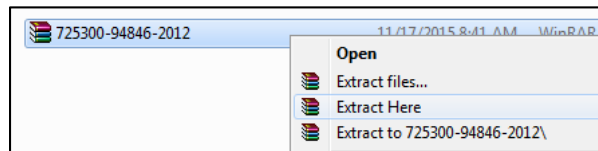

- e. Move the extracted file to the folder containing the **process\_isd\_met\_data.m** script
  - f. Repeat Steps B through E for each required year of meteorological data (if your study spans more than one year)

| Name                             | Date modified      | Type                 | Size   |
|----------------------------------|--------------------|----------------------|--------|
| 725300-94846-2012                | 8/14/2015 10:42 PM | File                 | 532 KB |
| 725300-94846-2013                | 8/14/2015 11:37 PM | File                 | 531 KB |
| 725300-94846-2014                | 8/15/2015 12:49 AM | File                 | 531 KB |
| PCB_LFER_descriptors             | 2/22/2016 9:18 AM  | Microsoft Excel C... | 7 KB   |
| PCB_PROPERTIES_MW_DU_KOA         | 11/17/2015 2:05 PM | Microsoft Excel C... | 8 KB   |
| process_isd_met_data.m           | 1/15/2016 9:42 AM  | M File               | 16 KB  |
| PUF_PAS_Effective_Volume_Model.m | 3/1/2016 4:26 PM   | M File               | 14 KB  |

3. Check the data quality and convert the meteorological data to the required format of each individual year using the **process\_isd\_met\_data.m** script.

a. The input should be in the form of

**process\_isd\_met\_data ('XXXXXX-XXXXX',iYear, NumberYears);**

where,

- i. 'XXXXXX-XXXXX' = the site ID to be combine formatted as a string (i.e. enclosed in apostrophes ' ').
- ii. iYear = the first year of the data to be combined
- iii. NumberYears = the number of years to be combined

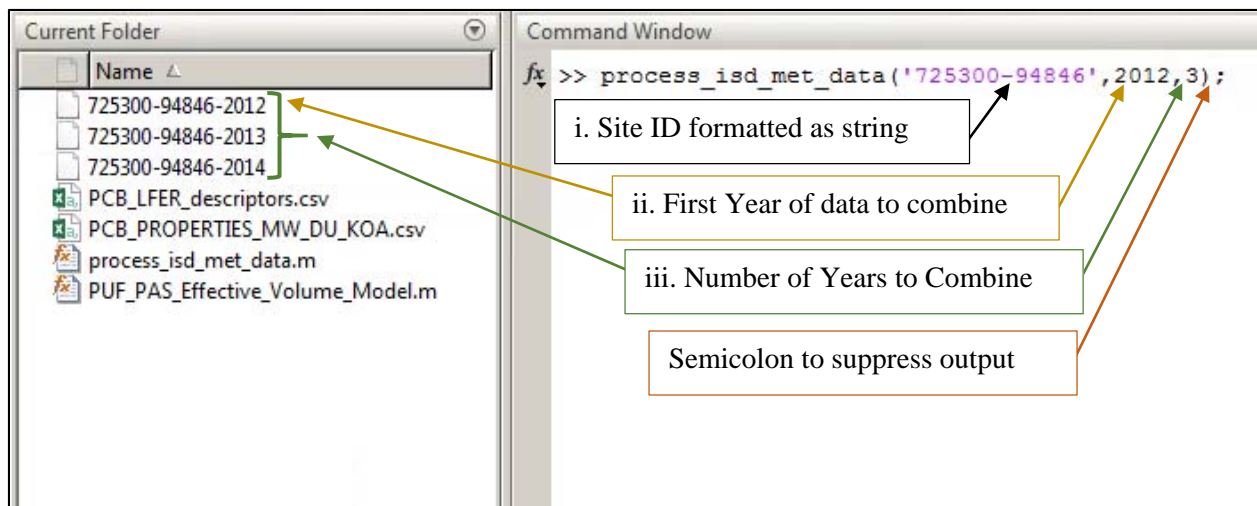

- b. A final formatted csv file with the site ID will be created with a summary of the data quality for each year that will be both printed to the screen after the run and saved as a readme file to be accessed later. The readme file will overwrite any previous version of the file. The script will provide a summary of missing values for all 5 weather parameters and detect any gaps greater than 12 hours.
- c. Below is an example of a weather data station being run for 3 consecutive years and the resulting data quality summary.

The screenshot displays a software interface with two main panes: 'Current Folder' and 'Command Window'.

**Current Folder:** Lists files for site 725300-94846 for years 2012, 2013, and 2014. Files include ReadMe.txt files for each year and a final combined formatted csv file. Annotations highlight the 'Final combined formatted csv file' and 'Saved Data Quality Readme files'.

**Command Window:** Shows the execution of the command `>> process_isd_met_data('725300-94846',2012,3);`. The output consists of three data quality summaries, one for each year (2012, 2013, and 2014). Each summary lists the total missing hours and the percentage of total hours for five parameters: Temperature, Dew Point, Pressure, Wind Direction, and Wind Speed. Annotations highlight the '# of missing values' and '% of total hours' for each parameter.

| Year | Temperature   | Dew Point     | Pressure      | Wind Direction | Wind Speed    |
|------|---------------|---------------|---------------|----------------|---------------|
| 2012 | 3 (0.034153%) | 4 (0.045537%) | 78 (0.88798%) | 106 (1.2067%)  | 29 (0.33015%) |
| 2013 | 17 (0.19406%) | 17 (0.19406%) | 141 (1.6096%) | 111 (1.2671%)  | 19 (0.21689%) |
| 2014 | 11 (0.12557%) | 11 (0.12557%) | 164 (1.8721%) | 105 (1.1986%)  | 11 (0.12557%) |



- d. The script will also detect if there are any gaps in data greater than 12 hours. This threshold can be change in **line 68** of the **process\_isd\_met\_data.m** script if desired. In the example shown below there are 4 gaps greater than 12 hours for temperature, wind speed, and wind direction, while pressure and dew point are missing all measurements for the year. This data quality would be insufficient for the flowrate model since it does not contain any pressure or dew point measurements, and a different weather station would need to be selected (steps 1-2)

```

64
65 %Subfuntion that counts the null values (-9999) and logs any large gaps.
66 %for missing values it assumes continuity with previous measurements
67
68 - LargeGapThreshold = 12; %Threshold (in hours) for flagging consecutive missing values
69
70 - [TA,TAcount,TALargeGaps] = correctgaps(TA,0.1,LargeGapThreshold);
71 - [TD,TDcount,TDLargeGaps] = correctgaps(TD,0.1,LargeGapThreshold);
72 - [Pr,Prcount,PrLargeGaps] = correctgaps(Pr,10,LargeGapThreshold);
73 - [WD,WDCount,WDLargeGaps] = correctgaps(WD,1,LargeGapThreshold);
74 - [WS,WScount,WSLargeGaps] = correctgaps(WS,0.1,LargeGapThreshold);
75

```

**Summary Results**

```

>> process_isd_met_data('997338-99999',2013,1);
-----Data Quality Summary for the input site 997338-99999-2013-----

Total Missing Hours for Temperature    = 280 (3.1971%)
Total Missing Hours for Dew Point      = 8758 (100%)
Total Missing Hours for Pressure       = 8758 (100%)
Total Missing Hours for Wind Direction = 264 (3.0144%)
Total Missing Hours for Wind Speed     = 264 (3.0144%)

-----Gaps > 12 hours in Data for Temperature-----
Missing Data for 37 hours between 2013022705 and 2013022818
Missing Data for 40 hours between 2013030107 and 2013030223
Missing Data for 16 hours between 2013083107 and 2013083123
Missing Data for 36 hours between 2013111622 and 2013111810

-----Gaps > 12 hours in Data for Dew Point-----
Missing Data for 8757 hours between 2013010100 and 2013123123

-----Gaps > 12 hours in Data for Pressure-----
Missing Data for 8757 hours between 2013010100 and 2013123123

-----Gaps > 12 hours in Data for Wind Speed-----
Missing Data for 37 hours between 2013022705 and 2013022818
Missing Data for 40 hours between 2013030107 and 2013030223
Missing Data for 16 hours between 2013083107 and 2013083123
Missing Data for 36 hours between 2013111622 and 2013111810

-----Gaps > 12 hours in Data for Wind Direction-----
Missing Data for 37 hours between 2013022705 and 2013022818
Missing Data for 40 hours between 2013030107 and 2013030223
Missing Data for 16 hours between 2013083107 and 2013083123
Missing Data for 36 hours between 2013111622 and 2013111810

fx >> |

```

Annotations in the screenshot:

- Blue arrows point to the 'Total Missing Hours for Pressure' and 'Total Missing Hours for Dew Point' lines, with a callout box stating: "Missing all pressure and dew point".
- Green arrows point to the 'Gaps > 12 hours' sections for Temperature, Dew Point, Pressure, Wind Speed, and Wind Direction, with a callout box stating: "Gaps greater than large gap threshold listed here (12 hours is default)".

4. After the met data has been converted use the **PUF\_PAS\_Effective\_Volume\_Model.m** script to obtain congener and deployment specific effective sampling volumes and sampling rates [Note: ensure the accompanying PCB physical-chemical properties CSV file (**PCB\_PROPERTIES\_MW\_DU\_KOA.csv**) and the PCB LFER descriptors CSV file (**PCB\_LFER\_descriptors.csv**) are in the same location as the **PUF\_PAS\_Effective\_Volume\_Model.m** script].
  - a. Prior to running the script a few modification at the beginning of the script may need to be made at the beginning of the script.
    1. **Line 12:** Output file name (Use a name descriptive to the specific run)
    2. **Line 17:** Select the method for determining the air/PUF partition coefficient
      - a. Method 1 is the empirical relationship (with temperature adjusted Koa) from Shoeib and Harner (2002)<sup>7</sup>
      - b. Method 2 is the temperature dependent linear free energy relationship for polyurethane foam from Sprunger et al. (2007)<sup>5</sup>
    3. **Lines 21-24:** PUF Disk Parameters specific to the study.

Note: A screen shot of the beginning of the script where the above parameters can be adjusted is shown below.

```

1 function[PAS_Array,DeploymentMetData] = PUF_PAS_Effective_Volume_Model(Deployment,Collection,PUF_ID,MET_ID)
2 %This model was originally published by Herkert et al. (2016) Environ. Sci. Technol.
3 %based upon a model first developed by Petrich et al. (2013) Environ. Sci. Technol.
4
5 %Input variable formats:
6 % Deployment = PUF Deployment Date formatted as YYYYMMDDHH
7 % Collection = PUF Collection Date formatted as YYYYMMDDHH
8 % PUF_ID = Numerical PUF ID for identification in output data set
9 % MET_ID = string of AWS site ID formatted as 'XXXXXX-XXXXX.csv' for the weather data to be used for the PUF deployment
10
11 %Specify output file name and location
12 outfilename = 'Generic_Output_File_Name.csv';
13
14 %Specify the method for determining KPUF.
15 % 1 = Empirical relationship with temperature adjusted Koa from Shoeib and Harner (2002) Environ. Sci. Technol.
16 % 2 = Temperature dependent linear free energy relationship for polyurethane foam from Sprunger et al. (2007) Anal. Chem.
17 KPUFMethod = 1;
18
19 %Declarations: Known variables about PUF disk parameters to be used
20 %The default parameters are for PUF from Tisch Environmental used by Herkert et al. (2016)
21 diameter = 0.14; % Length of PUF disk (m)
22 thickness = 0.0135; % Thickness of PUF disk (m)
23 dpuf = 21173; % Density of PUF (g/m^3)
24 As = .0365; % Surface area of the PUF (m^2)
25

```

b. The input should be in the form

**PUF\_PAS\_Effective\_Volume\_Model(Deployment,Collection,PUF\_ID,MET\_ID);**

where,

- i. Deployment = PUF Deployment Date formatted as YYYYMMDDHH
- ii. Collection = PUF Collection Date formatted as YYYYMMDDHH
- iii. PUF\_ID = Numerical PUF ID for identification in output data
- iv. MET\_ID = string of AWS site ID formatted as 'XXXXXX-XXXXX' for the weather data to be used for the PUF deployment

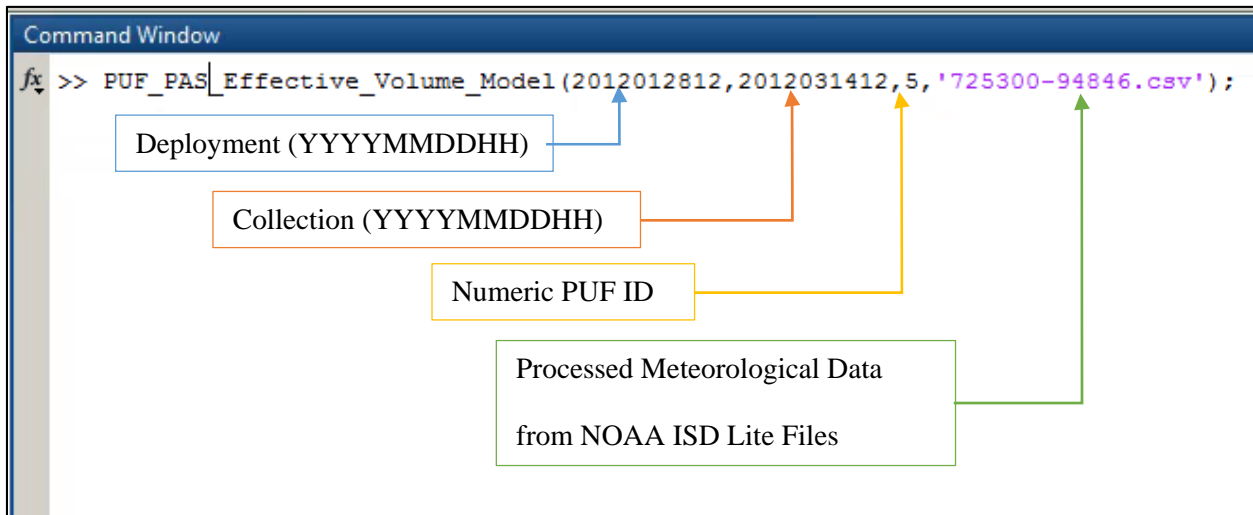

- c. The final output file will produce a comma delimited file that can be opened in Microsoft Excel.

|    | A | B          | C          | D    | E        | F | G        | H        | I        | J        |
|----|---|------------|------------|------|----------|---|----------|----------|----------|----------|
| 1  | 5 | 2012012812 | 2012031412 | 1105 | 46.78733 | 1 | 63.37986 | 103.706  | 108.0177 | 127.0171 |
| 2  | 5 | 2012012812 | 2012031412 | 1105 | 46.78733 | 2 | 4.517572 | 4.792622 | 4.821794 | 4.710386 |
| 3  |   |            |            |      |          |   |          |          |          |          |
| 4  |   |            |            |      |          |   |          |          |          |          |
| 5  |   |            |            |      |          |   |          |          |          |          |
| 6  |   |            |            |      |          |   |          |          |          |          |
| 7  |   |            |            |      |          |   |          |          |          |          |
| 8  |   |            |            |      |          |   |          |          |          |          |
| 9  |   |            |            |      |          |   |          |          |          |          |
| 10 |   |            |            |      |          |   |          |          |          |          |
| 11 |   |            |            |      |          |   |          |          |          |          |
| 12 |   |            |            |      |          |   |          |          |          |          |
| 13 |   |            |            |      |          |   |          |          |          |          |
| 14 |   |            |            |      |          |   |          |          |          |          |
| 15 |   |            |            |      |          |   |          |          |          |          |
| 16 |   |            |            |      |          |   |          |          |          |          |
| 17 |   |            |            |      |          |   |          |          |          |          |
| 18 |   |            |            |      |          |   |          |          |          |          |
| 19 |   |            |            |      |          |   |          |          |          |          |
| 20 |   |            |            |      |          |   |          |          |          |          |
| 21 |   |            |            |      |          |   |          |          |          |          |
| 22 |   |            |            |      |          |   |          |          |          |          |
| 23 |   |            |            |      |          |   |          |          |          |          |
| 24 |   |            |            |      |          |   |          |          |          |          |
| 25 |   |            |            |      |          |   |          |          |          |          |

Numerically Coded Output Variables;  
 1 = Effective Sampling Volume (m<sup>3</sup>)  
 2 = Sampling Rate (m<sup>3</sup>/d)

% of wind speed measurements that exceed calibration range (> 5 m/s)

Deployment Length (hours)

Collection (YYYYMMDDHH)

Deployment (YYYYMMDDHH)

Numeric PUF ID

PCB 1

PCB 2

PCB 209

5. (OPTIONAL) If you want to run many samples in a row, a new script can be set up to run PUF consecutively.

- a. First open a new blank script by clicking “New Script” in the open left-hand corner of the MATLAB window.

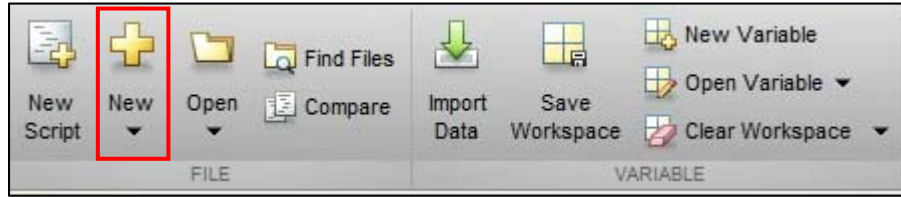

- b. Then repeat the format from step 4B for as many PUF as needed and hit run (highlighted in red box)

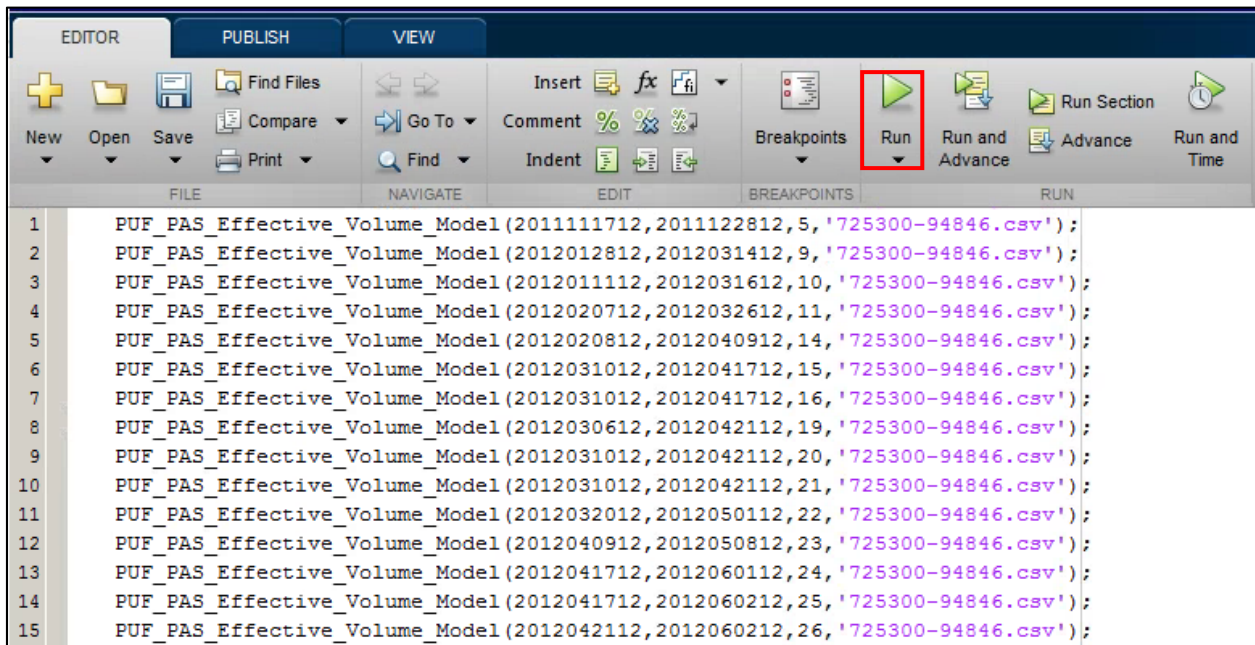

- c. These run commands can also be created in excel using the concatenate function and pasted into the new script to speed up this process.

| SUM                                                                              |                |                                                               |                    |   |                                                                                  |
|----------------------------------------------------------------------------------|----------------|---------------------------------------------------------------|--------------------|---|----------------------------------------------------------------------------------|
| =CONCATENATE("PUF_PAS_Effective_Volume_Model(",B16,",",C16,",",A16,",",D16,");") |                |                                                               |                    |   |                                                                                  |
| A                                                                                | B              | C                                                             | D                  | E | F                                                                                |
| 6                                                                                | PUFID -->      | Numerically Assigned PUF ID for identification in output data |                    |   |                                                                                  |
| 7                                                                                | Deployment --> | Deployment Date formatted as YYYYMMDDHH                       |                    |   |                                                                                  |
| 8                                                                                | Collection --> | Collection Date formatted as YYYYMMDDHH                       |                    |   |                                                                                  |
| 9                                                                                | Met_ID -->     | AWS Site ID formatted as a string 'XXXXXX-XXXXX'              |                    |   |                                                                                  |
| 10                                                                               |                |                                                               |                    |   |                                                                                  |
| PUF_ID                                                                           | Deployment     | Collection                                                    | MET_ID             |   | Run Command                                                                      |
| 5                                                                                | 2011111712     | 2011122812                                                    | '725300-94846.csv' |   | PUF_PAS_Effective_Volume_Model(2011111712,2011122812,5,'725300-94846.csv');      |
| 9                                                                                | 2012012812     | 2012031412                                                    | '725300-94846.csv' |   | PUF_PAS_Effective_Volume_Model(2012012812,2012031412,9,'725300-94846.csv');      |
| 10                                                                               | 2012011112     | 2012031612                                                    | '725300-94846.csv' |   | PUF_PAS_Effective_Volume_Model(2012011112,2012031612,10,'725300-94846.csv');     |
| 11                                                                               | 2012020712     | 2012032612                                                    | '725300-94846.csv' |   | PUF_PAS_Effective_Volume_Model(2012020712,2012032612,11,'725300-94846.csv');     |
| 14                                                                               | 2012020812     | 2012040912                                                    | '725300-94846.csv' |   | =CONCATENATE("PUF_PAS_Effective_Volume_Model(",B16,",",C16,",",A16,",",D16,");") |
| 15                                                                               | 2012031012     | 2012041712                                                    | '725300-94846.csv' |   | PUF_PAS_Effective_Volume_Model(2012031012,2012041712,15,'725300-94846.csv');     |
| 16                                                                               | 2012031012     | 2012041712                                                    | '725300-94846.csv' |   | PUF_PAS_Effective_Volume_Model(2012031012,2012041712,16,'725300-94846.csv');     |
| 19                                                                               | 2012030612     | 2012042112                                                    | '725300-94846.csv' |   | PUF_PAS_Effective_Volume_Model(2012030612,2012042112,19,'725300-94846.csv');     |
| 20                                                                               | 2012031012     | 2012042112                                                    | '725300-94846.csv' |   | PUF_PAS_Effective_Volume_Model(2012031012,2012042112,20,'725300-94846.csv');     |

- d. If this is done the output file will have the same format as previously described preceding down the columns in the order the PUF were run

|    | A  | B          | C          | D    | E        | F | G        | H        | I        | J        | K        | L        |
|----|----|------------|------------|------|----------|---|----------|----------|----------|----------|----------|----------|
| 1  | 5  | 2012012812 | 2012031412 | 1105 | 46.78733 | 1 | 63.37986 | 103.706  | 108.0177 | 127.0171 | 169.9775 | 163.9116 |
| 2  | 5  | 2012012812 | 2012031412 | 1105 | 46.78733 | 2 | 4.517572 | 4.792622 | 4.821794 | 4.710386 | 5.00201  | 4.955705 |
| 3  | 9  | 2012012812 | 2012031412 | 1105 | 46.78733 | 1 | 63.37986 | 103.706  | 108.0177 | 127.0171 | 169.9775 | 163.9116 |
| 4  | 9  | 2012012812 | 2012031412 | 1105 | 46.78733 | 2 | 4.517572 | 4.792622 | 4.821794 | 4.710386 | 5.00201  | 4.955705 |
| 5  | 10 | 2012011112 | 2012031612 | 1561 | 44.52274 | 1 | 58.13245 | 107.682  | 113.4634 | 142.424  | 207.1393 | 197.7077 |
| 6  | 10 | 2012011112 | 2012031612 | 1561 | 44.52274 | 2 | 4.389495 | 4.656748 | 4.685093 | 4.576843 | 4.860199 | 4.815207 |
| 7  | 11 | 2012020712 | 2012032612 | 1153 | 44.57936 | 1 | 37.76773 | 69.94987 | 74.10364 | 97.1599  | 148.5119 | 140.5724 |
| 8  | 11 | 2012020712 | 2012032612 | 1153 | 44.57936 | 2 | 4.728145 | 5.016016 | 5.046548 | 4.929946 | 5.235163 | 5.1867   |
| 9  | 14 | 2012020812 | 2012040912 | 1465 | 45.80205 | 1 | 50.97058 | 85.92163 | 90.42468 | 115.4995 | 178.3171 | 168.3355 |
| 10 | 14 | 2012020812 | 2012040912 | 1465 | 45.80205 | 2 | 4.793166 | 5.084996 | 5.115948 | 4.997743 | 5.307157 | 5.258027 |
| 11 | 15 | 2012031012 | 2012041712 | 913  | 44.24973 | 1 | 46.8062  | 77.45591 | 81.04287 | 98.83027 | 139.6872 | 133.5291 |
| 12 | 15 | 2012031012 | 2012041712 | 913  | 44.24973 | 2 | 5.087936 | 5.397713 | 5.430568 | 5.305094 | 5.633537 | 5.581385 |
| 13 | 16 | 2012031012 | 2012041712 | 913  | 44.24973 | 1 | 46.8062  | 77.45591 | 81.04287 | 98.83027 | 139.6872 | 133.5291 |
| 14 | 16 | 2012031012 | 2012041712 | 913  | 44.24973 | 2 | 5.087936 | 5.397713 | 5.430568 | 5.305094 | 5.633537 | 5.581385 |
| 15 | 19 | 2012030612 | 2012042112 | 1105 | 47.69231 | 1 | 49.67255 | 82.53264 | 86.51863 | 107.1889 | 156.6825 | 149.045  |
| 16 | 19 | 2012030612 | 2012042112 | 1105 | 47.69231 | 2 | 5.067846 | 5.376399 | 5.409125 | 5.284146 | 5.611292 | 5.559346 |

6. (OPTIONAL) The outputs (as well as meteorological data) can be saved directly in MATLAB to create figures and view trends.

a. Assign Variable for the PUF array and meteorological data

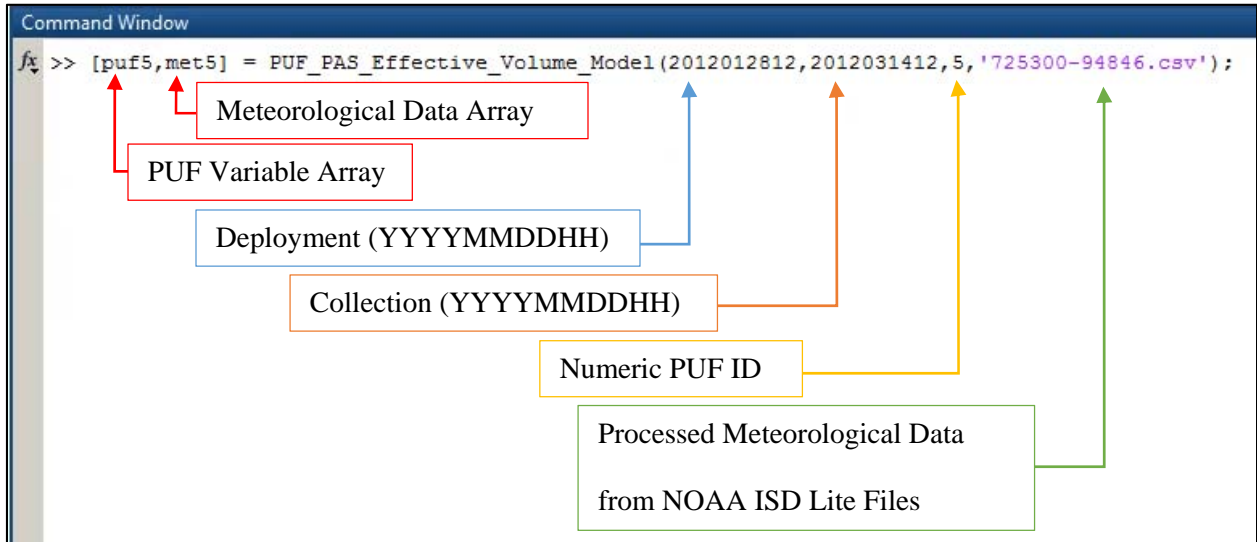

b. After running the `PUF_PAS_Flowrate_Model.m` script, the Meteorological Data Array and PUF Variable Array are available in the workspace.

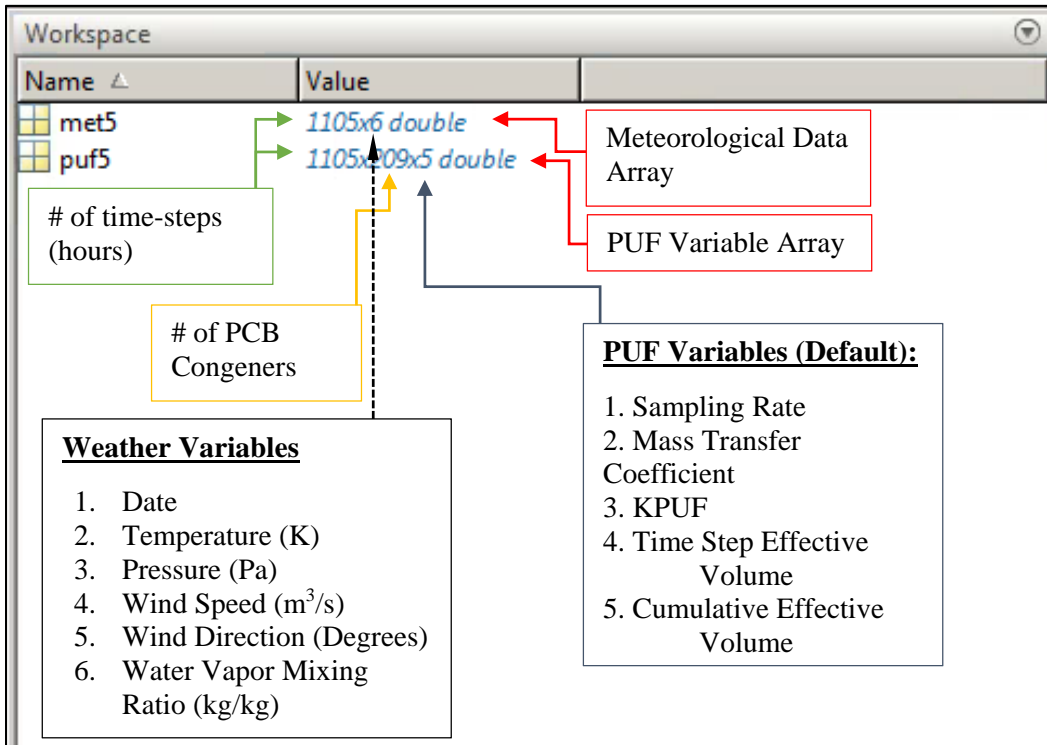

- c. The PUF Variables are defined on **lines 103-113** of the **PUF\_PAS\_Effective\_Volume\_Model.m** script and additional variables can be defined here by increasing the size of the **PAS\_Array** to examine other trends if desired.

```
102
103     %Fill in PAS_Array for variables. This is a 3D array that gets populated during the run
104 -     PAS_Array(t,C,1) = Rs;
105 -     PAS_Array(t,C,2) = kv;
106 -     PAS_Array(t,C,3) = KPUF;
107 -     PAS_Array(t,C,4) = Veff;
108
109     %Index 5 is time integrated effective volume
110 -     if t == 1
111 -         PAS_Array(t,C,5) = Veff;
112 -     else
113 -         PAS_Array(t,C,5) = Veff + PAS_Array((t-1),C,5);
114 -     end
115 - end
116 - end
```



## References

1. National Centers For Environmental Information, Integrated Surface Database (ISD). [www.ncdc.noaa.gov/isd](http://www.ncdc.noaa.gov/isd) (Accessed December 3, 2015),
2. Melymuk, L.; Robson, M.; Helm, P. A.; Diamond, M. L., Evaluation of passive air sampler calibrations: Selection of sampling rates and implications for the measurement of persistent organic pollutants in air. *Atmos. Environ.* **2011**, *45*, (10), 1867-1875.
3. Chaemfa, C.; Barber, J. L.; Gocht, T.; Harner, T.; Holoubek, I.; Klanova, J.; Jones, K. C., Field calibration of polyurethane foam (PUF) disk passive air samplers for PCBs and OC pesticides. *Environ. Pollut.* **2008**, *156*, (3), 1290-1297.
4. Harner, T.; Su, K.; Genualdi, S.; Karpowicz, J.; Ahrens, L.; Mihele, C.; Schuster, J.; Charland, J. P.; Narayan, J., Calibration and application of PUF disk passive air samplers for tracking polycyclic aromatic compounds (PACs). *Atmos. Environ.* **2013**, *75*, 123-128.
5. Sprunger, L.; Acree, W. E.; Abraham, M. H., Comment on "Systematic investigation of the sorption properties of polyurethane foams for organic vapors". *Anal. Chem.* **2007**, *79*, (17), 6891-6893.
6. Kamprad, I.; Goss, K. U., Systematic investigation of the sorption properties of polyurethane foams for organic vapors. *Anal. Chem.* **2007**, *79*, (11), 4222-4227.
7. Shoeib, M.; Harner, T., Characterization and comparison of three passive air samplers for persistent organic pollutants. *Environ. Sci. Technol.* **2002**, *36*, (19), 4142-4151.
